# Supplementary material
Source: PubMed Central journal article supplement (PMC11345850)
Supplement: NIHMS2008595-supplement-Supplementary_Material.pdf [file NIHMS2008595-supplement-Supplementary_Material.pdf]

## Supplementary Appendix

Supplement to: Lieberman NAP, Reid TB, Cannon CA, et al. Near-universal resistance to macrolides of *Treponema pallidum* in North America. N Engl J Med 2024;390:2127-8. DOI: 10.1056/NEJMc2314441

This appendix has been provided by the authors to give readers additional information about the work.

## SUPPLEMENTARY APPENDIX

Lieberman et al., 2023

### Near-universal resistance to macrolides of *Treponema pallidum* in North America

| <b>Table of Contents</b>                                                                                       | <b>Page</b> |
|----------------------------------------------------------------------------------------------------------------|-------------|
| Methods                                                                                                        | 2           |
| <i>Ethical approvals and scope</i>                                                                             | 2           |
| <i>Sample collection, T. pallidum molecular detection, and genomic DNA extraction</i>                          | 2           |
| <i>Whole genome library preparation and sequencing</i>                                                         | 4           |
| <i>Genome Assembly</i>                                                                                         | 4           |
| <i>Phylogenetic Analysis</i>                                                                                   | 5           |
| <i>Sanger Sequencing of 23S amplicons</i>                                                                      | 5           |
| <i>Restriction Length Fragment Polymorphism (RFLP)-based detection of A2058G and A2059G mutations</i>          | 6           |
| <i>PCR-based detection of A2058G and A2059G mutations</i>                                                      | 6           |
| <i>Prior Reporting</i>                                                                                         | 7           |
| Part A: Alternative antibiotic choices for syphilis                                                            | 8           |
| Part B: Background to azithromycin use in <i>T. pallidum</i>                                                   | 10          |
| Table S1: Patient Characteristics                                                                              | 13          |
| Table S2: Representativeness of syphilis patients included in analysis                                         | 16          |
| Table S3: Annotated bibliography of studies worldwide evaluating genotypic AZ resistance in <i>T. pallidum</i> | 18          |
| Supplementary References                                                                                       | 22          |

## Methods

### *Ethical approvals and scope*

Samples collected in Seattle, WA as part of Studies A and B (Supplementary Data) were conducted at the Seattle King County Sexual Health Clinic and approved by the University of Washington Institutional Review Board (IRB) (STUDY00010265 and STUDY00009493, respectively). Study A included remnant pharyngeal, rectal, and vaginal Aptima swabs from patients with a serological diagnosis of syphilis, while Study B involved the collection of swabs of anogenital lesions and oral mucosa from patients with active syphilis. Study C was a multicenter clinical trial (NCT03637660) conducted at Emory University and the University of Alabama at Birmingham (UAB) that involved collection of oral and lesion swabs prior to treatment with penicillin (UAB IRB, protocol# 300001726). Sample collection for Study D was performed at the San Francisco Department of Public Health under protocol University of California, San Francisco IRB protocol # 16-20056. Study E comprised a single sample collected during routine patient care and was therefore not subject to IRB approval. For study F, remnant clinical specimens were obtained from the UW Molecular Microbiology laboratory. The study was approved by the University of Washington IRB (STUDY00138377). Study G was composed of samples received for *T. pallidum* molecular testing at the British Columbia Centre for Disease Control (BCCDC). Study H included oral/lesion swabs or ocular fluid samples or extracted DNA sent to the United States Centers for Disease Control and Prevention (CDC) for molecular surveillance and diagnostics development activities from BCCDC, University of Alberta (IRB: Pro00071804), Emory University (IRB00089239), St. Louis County Sexual Health Clinic, and Dallas County Health and Human Services. Samples used for public health surveillance are IRB exempt.

Whole genome sequencing of deidentified samples was approved by the University of Washington IRB (STUDY00000408 and STUDY00000885).

*Sample collection, T. pallidum molecular detection, and genomic DNA extraction*

In Study A, *T. pallidum* genomic DNA was detected using transcription-mediated amplification (TMA) of remnant Aptima swab and urine specimens<sup>1</sup>. Genomic DNA was isolated from 200 µL of TMA-positive specimens using the MagNA Pure Total Nucleic Acid Isolation Kit I (Roche) with external lysis using the MagNA Pure 24 instrument. Elution volume was 50 µL.

For Studies B, C, and D, oral or lesion swabs were collected into 1 mL 10 mM Tris, 0.1 M EDTA, with 0.5% SDS. Genomic DNA was extracted from 200 µL of sample buffer using the QIAamp DNA Mini Kit (Qiagen) with a 100 µL elution volume. *T. pallidum* DNA was detected by *TP47* qPCR<sup>2</sup>.

For Study E, fourteen 4 µm tissue sections of an 8 mm by 1 mm core needle biopsy were cut from a paraffin-embedded lymph node and combined into a 1.5 ml sterile plastic tube. Deparaffinization and DNA extraction were performed using the QIAamp DNA formalin fixed paraffin embedded (FFPE) Tissue Kit (Qiagen) per the manufacturer's specifications and eluted in 100 µL. Positive qPCR for *TP47* and Warthin-Starry staining confirmed the presence of *T. pallidum*.

For Study F, DNA was extracted as previously described<sup>3</sup> from remnant FFPE or fresh tissue/body fluids samples submitted to the UW Molecular Microbiology laboratory. Samples were interrogated for the presence of *T. pallidum* by either 1) broad-range bacterial PCR with Sanger sequencing<sup>3,4</sup> and amplicon next-generation sequencing for polymicrobial specimens or

2) a proprietary *T. pallidum*-specific laboratory developed nucleic acid amplification test.

Taxonomic identification was established following validated procedures including pathologist case review<sup>5</sup>.

For Study G, genomic DNA from samples sent to the BCCDC for *T. pallidum* screening was extracted using the Qiagen Blood and Tissue kit and tested for the presence of *T. pallidum* genomic DNA by real-time PCR<sup>6</sup>. Study H samples sent to the CDC were extracted using the Qiagen QIAmp DNA Mini Kit (Qiagen, Germantown, MD), followed by real-time PCR-based detection of *T. pallidum*<sup>7</sup>.

#### *Whole genome library preparation and sequencing*

Whole genome sequencing (WGS) was attempted at the University of Washington on most samples from Studies A-F with more than 10 *TP47* copies/ $\mu$ L. Libraries were prepared from gDNA using the KAPA HyperPlus kit with UDI adapters (Roche). Up to 100 ng genomic DNA in 8.25 $\mu$ L was used as input for fragmentation for eight minutes, A-tailed and adapters ligated, amplified with 14 PCR cycles, and cleaned with 0.8X AMPureXP beads (Beckman Coulter). 250 ng from each of three libraries were pooled based on similar treponemal load and were enriched using custom biotinylated probes based on the *T. pallidum* reference sequence NC\_010741.1 (NCBI) and the IDT xGen Hybridization and Wash kit with overnight hybridization followed by 14 cycles of post-capture PCR. Post-capture libraries were purified using a 0.8X AMPureXP cleanup. Sequencing was performed on 2x151bp Illumina NextSeq2000 or NovaSeq6000 runs<sup>8,9</sup>.

#### *Genome Assembly*

Genomes were assembled using previously published method<sup>8,10</sup>. Paired-end reads were adapter and quality trimmed using Trimmomatic v0.35<sup>11</sup>, kmer filtered to remove human reads using bbdduk v38.86<sup>12</sup>, and mapped to the *T. pallidum* SS14 reference genome (NC\_021508.1), using Bowtie2 software (version 2.4.1)<sup>13</sup> and A2058G/A2059G variants called by freebayes v1.3.2<sup>14</sup>. Mapped reads were *de novo* assembled to scaffolds with Unicycler (version 0.4.4)<sup>15</sup>, gaps filled with reference, and iterative remapping of reads performed prior to cleaning with Pilon v1.23.0<sup>16</sup> and calling final consensus. Genomes were considered near-complete if they had less than 5% missing data. To evaluate the presence of the resistance allele, BAM files from samples that had insufficient sequencing depth to generate a near-complete consensus were manually inspected in Geneious Prime v2023.0.4.

Raw data files and consensus genomes have been deposited to NCBI Sequence Read Archive and GenBank under BioProject PRJNA1038754.

### *Phylogenetic Analysis*

Consensus genomes were masked at repetitive loci<sup>10</sup> and aligned with mafft v7.471<sup>17</sup>. Polymorphic sites were extracted with snp-sites v2.5.1<sup>18</sup> and maximum likelihood phylogeny determined using iqtree v2.0.3<sup>19</sup>, employing the automated model finder with ascertainment bias correction and 1000 ultrafast bootstraps. The phylogeny was visualized with ggtree<sup>20</sup> and ggplot in R v4.2.1.

### *Sanger Sequencing of 23S amplicons*

For samples from Studies A-F that had insufficient genome copies to attempt WGS, or did not have coverage of the azithromycin resistance loci, we instead amplified a 628 bp fragment<sup>21</sup> of

the genes encoding the two 23S rRNA copies and performed Sanger sequencing. Up to 8  $\mu$ L DNA was used as input to a 20  $\mu$ L PCR reaction that also contained 10  $\mu$ L 2x CloneAmp HiFi Master Mix (Takara) and 1  $\mu$ L each 10  $\mu$ M forward (5-GTACCGCAAACCGACACAG-3) and reverse (5- AGTCAAACCGCCCCACCTAC-3) primers. All PCR batches included a no-template control (NTC). PCR was performed on a ProFlex thermocycler (Thermo) with a 2 minute denaturation at 98°C, followed by 35 cycles of 98°C/10 sec, 70°C/15 sec, 72°C/30 sec, then 5 minutes at 72°C and cold hold. The presence of a band at ~600 bp was verified by 1.4% agarose gel electrophoresis of 4  $\mu$ l PCR reaction. No amplification of the NTC was also confirmed. Samples with a visible band were AMPure cleaned at 0.6x and sent for Sanger sequencing (Azenta) with the reverse PCR primer. Sequencing traces were manually reviewed for sufficient quality in Geneious v2023.0.4. Sanger sequencing quality scores have been deposited to NCBI Sequence Read Archive under BioProject PRJNA1038754.

#### *Restriction Length Fragment Polymorphism (RFLP)-based detection of A2058G and A2059G mutations*

Study G used a RFLP approach to detect genotypic resistance in *T. pallidum*<sup>6</sup>. The 23S rRNA gene was amplified using HotStarTaq Master Mix (Qiagen) with cycling conditions of 95C incubation (15 min), 45 cycles of 95°C/1 minute, 63°C/2 minutes, 72°C/1 minute, and a final 72°C elongation for 10 minutes. This generated a 629 bp fragment that was then digested overnight with MboII+BsaXI and a separate reaction containing BsaI; characteristic band sizes correspond to the presence of the different alleles<sup>6</sup>.

#### *PCR-based detection of A2058G and A2059G mutations*

Ten microliters of extracted DNA from Study H was used in a 25  $\mu$ L triplex PCR reaction<sup>22</sup> that included 200 nM each forward (5- GACTCTGGACACTGTCTCG-3) and reverse (5- Biotin-TTGACTCCGCCTAACCTGACG-3) primers as well as probes to detect wild type (5- FAM - TGAAGGTTACGGGGTCTTTCCGT-BHQ-3, A2058G (5- CalRed610 - TGAAGGTTACGGGGTCTTCCCGT-BHQ-3), and A2059G (5- Quasar670 - AAGGTTACGGGGTCTCTCCGTCT-BHQ -3) alleles. Magnesium Chloride (4nM) (Applied Biosystems, Waltham, MA), 400uM deoxynucleotide triphosphates (Applied Biosystems, Waltham, MA), and AmpliTaq Gold polymerase (ThermoFisher Scientific, Waltham, MA) was used with an initial hold of 95°C/10 minutes, followed by 50 cycles of 95°C for 20 seconds/65°C for 1 minute, and a final 65°C hold for 10 minutes.

#### *Prior Reporting*

Of the 604 samples, 181 (29.9%) had been included in previous publications (<sup>6,8,9,23,2425</sup>) with independent analyses. These samples are clearly identified in Supplementary Data.



## **Appendix A: Alternative antibiotic choices for syphilis**

Long-acting injectable forms of penicillin are the mainstay of syphilis therapy due to their effectiveness for achieving clinical resolution and prevention of late syphilis. However, increasing syphilis case and limited supply chains have led to recurrent shortages of penicillin globally<sup>26</sup>. Currently, there is a shortage of benzathine penicillin G (BPG) first declared April 26, 2023 in the United States (US)<sup>27</sup> while the discontinuation of procaine penicillin – an alternative therapy for treating patients with neurosyphilis in ambulatory settings – was announced by its sole supplier, Pfizer, on June 13, 2023. With rising demand for treatment, health systems and providers with ongoing supply shortages of BPG have transitioned to alternative oral regimens requiring multiday dosing. For early syphilis, such regimens are more burdensome for patients compared to an injection of BPG, heightening concern for lower completion rates, incomplete treatment, and selection of antibiotic resistant strains.

There are some data on the use of alternative therapies. Oral doxycycline is an alternative regimen for persons who are non-pregnant or not capable of pregnancy<sup>28</sup>. Unfortunately, doxycycline requires twice daily dosing for either 14 or 28 days, depending on syphilis stage. Amoxicillin with or without probenecid is an approved alternative regimen in the United Kingdom<sup>29</sup> and a primary regimen in Japan<sup>30</sup>, however is not included as an alternative in the CDC STI Treatment Guidelines<sup>31</sup>. Amoxicillin is also dosed orally but has an even higher pill burden than doxycycline, and in the United States has had regular shortages<sup>32</sup>.

Limited clinical studies have demonstrated that ceftriaxone is effective for early syphilis although the optimal duration of therapy has not been rigorously defined. It requires daily parenteral doses, but is nonetheless an alternative treatment for early syphilis with a serological response rate of 90% at six months post-treatment in a randomized trial from China<sup>33</sup>. Limited data suggest ceftriaxone may be useful in neurosyphilis: a daily dose of 1-2 g of ceftriaxone IM or IV achieves CSF concentrations of 0.4 mg/L<sup>34</sup>, which is > 160-fold higher than the reported minimum inhibitory concentration (MIC) value of 0.0025 mg/L<sup>35</sup>. In the case that parenteral administration of a cephalosporin is not possible, limited data demonstrate that an oral cephalosporin, cefixime, given twice daily for 10 days for early syphilis showed a serological response rate of 87% in a randomized trial<sup>36</sup>.

Several additional oral drug regimens with favorable pre-clinical data are currently in clinical trials. Linezolid demonstrated *in vitro* anti-treponemal activity at concentrations  $\geq 0.25$  mg/L<sup>37</sup>, with a favorable pharmacokinetic profile for CNS penetration and a history of successful treatment of other bacterial CNS infections<sup>38</sup>. A recent clinical trial concluded that the efficacy of linezolid at a daily dose of 600 mg for 5 days did not meet the non-inferiority criteria compared with BPG and, as a result, this treatment regimen should not be used to treat patients with early syphilis<sup>39</sup>. Additional clinical trials, however, are ongoing or planned in Spain, Peru, and the US to evaluate the efficacy of linezolid for early syphilis using a regimen of 600 mg twice daily for ten days<sup>40</sup>, which may be necessary to optimize pharmacokinetics and clinical efficacy. Zoliflodacin, an effective treatment for *N. gonorrhoeae*, may also be effective for syphilis given an MIC of 2 mg/L *in vitro*<sup>35</sup>; however there are no *in vivo* data in humans or animal models of syphilis.

Recently, Hayes *et al.* published a high throughput *in vitro* screening of nearly 100  $\beta$ -lactams that identified mezlocillin, cefmetazole, nafcillin, and azlocillin as the most promising compounds that could be further explored<sup>41</sup>. An antibiotic screening performed *in vitro* by Tantalo *et al.* provided evidence that carbapenems are largely ineffective and reiterated that amoxicillin, cephalosporins, doxycycline, and oxazolidinones are among the most promising candidates to be selected for future clinical trials to evaluate efficacy against syphilis<sup>35</sup>.

After more than 80 years of antibiotic treatments for syphilis, penicillin remains first line therapy and the only option for pregnant patients and neonates. Although several effective alternatives are available and others are undergoing clinical trials, all generally require multidose therapy given over days to weeks. Few alternative drugs have robust data supporting effectiveness in neurosyphilis.

## **Appendix B: Background to Azithromycin Use in *T. pallidum***

Although azithromycin (AZ) has demonstrated effectiveness in early syphilis with an oral single dose regimen, resistance to AZ is now widespread. Macrolides such as AZ inhibit bacterial protein synthesis by binding to the 50S ribosome and preventing exit of the nascent polypeptide. In *T. pallidum*, resistance is conferred by either of two single point mutations in the gene encoding the 23S ribosomal RNA subunit, A2058G or A2059G (in canonical *E. coli* numbering). The presence of either mutation renders the antibiotic unable to bind. Because *T. pallidum* is difficult to isolate from clinical samples and cannot be grown in axenic culture, phenotypic macrolide resistance testing cannot be performed using traditional clinical microbiologic methods. However, molecular detection of either mutation is 100% predictive of macrolide resistance<sup>42, 43</sup>.

Historically, macrolide antibiotics were used throughout the world to treat syphilis in persons with penicillin allergies or when access to penicillin was limited<sup>44</sup>. Interestingly, the first documented case of macrolide (erythromycin)-resistance was reported in *T. pallidum* strain SS14<sup>45</sup>, which was isolated from a penicillin-allergic patient in 1977. In the 2002 CDC STD Treatment guidelines<sup>46</sup>, a single 2g oral dose of azithromycin was discussed as an alternate therapy for syphilis based on preliminary data<sup>47</sup>. Due to its suitability for use in under-resourced settings, AZ treatment was used for patients in Madagascar following an analysis that showed no detection of A2058G among circulating strains, and only a single occurrence of A2059G<sup>48, 42</sup>.

However, by the mid-2000s, increasing numbers of treatment failures and genotypic resistance were documented in several geographic locations including the US<sup>21,49</sup> where macrolides were listed as an alternative regimen for those persons with penicillin allergy. AZ resistance may have been further induced in communities by widespread use of azithromycin to prevent sexually transmitted and respiratory infections<sup>50,51</sup>. Given that approximately half of *T. pallidum* strains from the United States tested between 2007 and 2009 harbored AZ resistance alleles<sup>52</sup> and due to documented treatment failures, AZ was no longer recommended as an alternate regimen for syphilis per the CDC STI treatment guidelines<sup>31</sup>. Analysis of the 23S mutations in the context of the worldwide *T. pallidum* phylogeny demonstrated that they arose independently in multiple co-circulating lineages<sup>53</sup>. This observation is consistent with macrolide treatment for any indication within in the prior 12 months being a risk factor for a subsequent syphilis infection with AZ resistance<sup>51</sup>.

Recent *in vitro* data have demonstrated that AZ concentrations up to 2 mg/L (64x the MIC for a sensitive strain) are still not effective against cultured *T. pallidum* strains harboring the A2058G or A2059G mutation<sup>35</sup>. Therefore, increasing the azithromycin dose is unlikely to overcome genotypic resistance in syphilis strains and could increase the risk for gastrointestinal side effects and cardiac events<sup>54,55</sup>. These *in vitro* results, combined with the high frequency of resistant *T. pallidum* genotypes and lack of point-of-care clinical resistance testing options, indicate that all syphilis cases should be presumed AZ-resistant.

**Table S1: Patient Characteristics. Per category totals include only cases with relevant metadata. Aggregate and per-year data are shown as number (percent) cases per category.**

**AZ resistance of aggregated data is number (percent) resistant per category.**

|                                         | <b>AZ Resistance n (%) resistant</b> | <b>All Years n (%) of category total</b> | <b>2017</b> | <b>2018</b> | <b>2019</b> | <b>2020</b> | <b>2021</b> | <b>2022</b> | <b>2023</b> | <b>Kendall's <math>\tau</math> (<math>p</math>)</b> |
|-----------------------------------------|--------------------------------------|------------------------------------------|-------------|-------------|-------------|-------------|-------------|-------------|-------------|-----------------------------------------------------|
| <b>Azithromycin Susceptibility</b>      |                                      |                                          |             |             |             |             |             |             |             |                                                     |
| <b>Resistant</b>                        | <b>599 (100)</b>                     | <i>599 (99.2)</i>                        | 26 (100)    | 80 (100)    | 152 (98.1)  | 67 (100)    | 119 (99.2)  | 81 (98.8)   | 73 (100)    | 0.169 (0.738)                                       |
| <b>Sensitive</b>                        | <b>5 (0)</b>                         | <i>5 (0.8)</i>                           | 0 (0)       | 0 (0)       | 3 (1.9)     | 0 (0)       | 1 (0.8)     | 1 (1.2)     | 0 (0)       | 0.169 (0.738)                                       |
| <b>Total</b>                            | <b>599 (99.2)</b>                    | <i>604<sup>a</sup></i>                   | 26          | 80          | 155         | 67          | 120         | 82          | 73          |                                                     |
| <b>Of resistant samples, 23S allele</b> |                                      |                                          |             |             |             |             |             |             |             |                                                     |
| A2058G                                  | <b>584 (100)</b>                     | <i>584 (97.5)</i>                        | 26 (100)    | 79 (98.8)   | 146 (96.1)  | 64 (95.5)   | 116 (97.5)  | 81 (100)    | 71 (97.3)   | -0.195 (0.646)                                      |
| A2059G                                  | <b>15 (100)</b>                      | <i>15 (2.5)</i>                          | 0 (0)       | 1 (1.2)     | 6 (3.9)     | 3 (4.5)     | 3 (2.5)     | 0 (0)       | 2 (2.7)     | 0.195 (0.646)                                       |
| <b>Total</b>                            | <b>599 (100)</b>                     | <i>599</i>                               | 26          | 80          | 152         | 67          | 119         | 81          | 73          |                                                     |
| <b>Sex</b>                              |                                      |                                          |             |             |             |             |             |             |             |                                                     |
| Female                                  | <b>121 (99.2)</b>                    | <i>122 (20.8)</i>                        | 1 (5.6)     | 23 (32.1)   | 29 (19.5)   | 8 (12.1)    | 20 (16.7)   | 15 (18.3)   | 24 (32.9)   | 0.333 (0.368)                                       |
| Male                                    | <b>460 (99.1)</b>                    | <i>464 (79.2)</i>                        | 17 (94.4)   | 53 (67.9)   | 120 (80.5)  | 58 (87.9)   | 100 (83.3)  | 67 (81.7)   | 49 (67.1)   | -0.333 (0.368)                                      |
| <b>Total</b>                            | <b>586 (99.1)</b>                    | <i>586</i>                               | 18          | 76          | 149         | 66          | 120         | 82          | 73          |                                                     |
| <b>Of males, orientation</b>            |                                      |                                          |             |             |             |             |             |             |             |                                                     |
| MSM                                     | <b>73 (100)</b>                      | <i>73 (83.0)</i>                         | 4 (100)     | 0 (NA)      | 13 (76.5)   | 8 (80)      | 28 (77.8)   | 18 (94.7)   | 2 (100)     | 0.276 (0.566)                                       |
| MSW                                     | <b>15 (100)</b>                      | <i>15 (17.0)</i>                         | 0 (0)       | 0 (NA)      | 4 (23.5)    | 2 (20)      | 8 (22.2)    | 1 (5.3)     | 0 (0)       | -0.276 (0.566)                                      |
| <b>Total</b>                            | <b>88 (100)</b>                      | <i>88</i>                                | 4           | 0           | 17          | 10          | 36          | 19          | 2           |                                                     |
| <b>Age</b>                              |                                      |                                          |             |             |             |             |             |             |             |                                                     |
| 0-17                                    | <b>5 (100)</b>                       | <i>5 (1.1)</i>                           | 0 (0)       | 0 (0)       | 0 (0)       | 0 (0)       | 0 (0)       | 2 (2.6)     | 3 (4.2)     | 0.724 (0.057)                                       |
| 18-24                                   | <b>69 (100)</b>                      | <i>69 (15.1)</i>                         | 1 (7.7)     | 6 (21.4)    | 7 (8.2)     | 5 (7.6)     | 24 (20.9)   | 12 (15.4)   | 14 (19.4)   | 0.143 (0.764)                                       |
| 25-29                                   | <b>96 (100)</b>                      | <i>96 (21.0)</i>                         | 3 (23.1)    | 3 (10.7)    | 27 (31.8)   | 16 (24.2)   | 25 (21.7)   | 14 (17.9)   | 8 (11.1)    | -0.333 (0.368)                                      |
| 30-34                                   | <b>77 (97.5)</b>                     | <i>79 (17.3)</i>                         | 2 (15.4)    | 5 (17.9)    | 11 (12.9)   | 14 (21.1)   | 16 (13.9)   | 16 (20.5)   | 15 (20.8)   | 0.333 (0.368)                                       |
| 35-39                                   | <b>62 (96.7)</b>                     | <i>64 (14.0)</i>                         | 2 (15.4)    | 6 (21.4)    | 6 (7.1)     | 6 (9.1)     | 20 (17.4)   | 10 (12.8)   | 14 (19.4)   | 0.143 (0.764)                                       |
| 40-44                                   | <b>49 (100)</b>                      | <i>49 (10.7)</i>                         | 2 (15.4)    | 3 (10.7)    | 13 (15.3)   | 8 (12.1)    | 11 (9.6)    | 6 (7.7)     | 6 (8.3)     | <b>-0.714 (0.035)</b>                               |
| 45-49                                   | <b>19 (100)</b>                      | <i>19 (4.2)</i>                          | 2 (15.4)    | 2 (7.1)     | 2 (2.4)     | 3 (4.5)     | 5 (4.3)     | 4 (5.1)     | 1 (1.4)     | -0.524 (0.133)                                      |
| 50-55                                   | <b>29 (100)</b>                      | <i>29 (6.3)</i>                          | 1 (7.7)     | 2 (7.1)     | 8 (9.4)     | 2 (3.0)     | 9 (7.8)     | 2 (2.6)     | 5 (6.9)     | -0.333 (0.368)                                      |
| 55-59                                   | <b>19 (100)</b>                      | <i>19 (4.2)</i>                          | 0 (0)       | 0 (0)       | 4 (4.7)     | 5 (4.7)     | 3 (2.6)     | 7 (9.0)     | 0 (0)       | 0.309 (0.433)                                       |
| 60+                                     | <b>27 (96.4)</b>                     | <i>28 (6.1)</i>                          | 0 (0)       | 1 (3.6)     | 7 (8.2)     | 7 (10.6)    | 2 (1.7)     | 5 (6.4)     | 6 (8.3)     | 0.429 (0.230)                                       |
| <b>Total</b>                            | <b>452 (98.9)</b>                    | <i>457</i>                               | 13          | 28          | 85          | 66          | 115         | 78          | 72          |                                                     |
| <b>Clinical syphilis stage</b>          |                                      |                                          |             |             |             |             |             |             |             |                                                     |
| Primary                                 | <b>32 (100)</b>                      | <i>32 (27.8)</i>                         | 0 (0)       | 0 (NA)      | 9 (50.0)    | 3 (30.0)    | 15 (26.8)   | 4 (16.0)    | 1 (20.0)    | -0.200 (0.707)                                      |
| Secondary                               | <b>56 (100)</b>                      | <i>56 (48.7)</i>                         | 1 (100)     | 0 (NA)      | 6 (33.3)    | 7 (70.0)    | 26 (46.4)   | 16 (64.0)   | 0 (0)       | -0.467 (0.260)                                      |
| Early Latent                            | <b>15 (100)</b>                      | <i>15 (13.0)</i>                         | 0 (0)       | 0 (NA)      | 1 (5.5)     | 0 (0)       | 10 (17.9)   | 3 (12.0)    | 1 (20.0)    | 0.690 (0.085)                                       |
| Congenital <sup>b</sup>                 | <b>5 (83.3)</b>                      | <i>6 (5.2)</i>                           | 0 (0)       | 0 (NA)      | 0 (0)       | 0 (0)       | 1 (1.8)     | 2 (8.0)     | 3 (60.0)    | <b>0.894 (0.027)</b>                                |
| Late/ Unk                               | <b>6 (100)</b>                       | <i>6 (5.2)</i>                           | 0 (0)       | 0 (NA)      | 2 (11.1)    | 0 (0)       | 4 (7.14)4   | 0 (0)       | 0 (0)       | -0.258 (0.652)                                      |
| <b>Total</b>                            | <b>114 (99.1)</b>                    | <i>115</i>                               | 1           | 0           | 18          | 10          | 56          | 25          | 5           |                                                     |
| <b>Race/Ethnicity</b>                   |                                      |                                          |             |             |             |             |             |             |             |                                                     |
| Asian                                   | <b>4 (100)</b>                       | <i>4 (5.1)</i>                           | 0 (0)       | 0 (0)       | 0 (0)       | 0 (0)       | 2 (4.9)     | 2 (9.5)     | 0 (0)       | -0.316 (0.724)                                      |
| Black                                   | <b>22 (100)</b>                      | <i>22 (27.8)</i>                         | 0 (0)       | 0 (0)       | 5 (62.5)    | 3 (42.9)    | 12 (29.3)   | 2 (9.5)     | 0 (0)       | -0.316 (0.724)                                      |
| Hispanic                                | <b>15 (100)</b>                      | <i>15 (19.0)</i>                         | 0 (0)       | 0 (0)       | 0 (0)       | 0 (0)       | 10 (24.4)   | 5 (23.8)    | 0 (0)       | 0.359 (0.5791)                                      |
| White                                   | <b>33 (100)</b>                      | <i>33 (41.8)</i>                         | 0 (0)       | 0 (0)       | 1 (12.5)    | 2 (28.6)    | 16 (39.0)   | 12 (57.1)   | 2 (100)     | -0.837 (0.096)                                      |
| NHPI                                    | <b>1 (100)</b>                       | <i>1 (1.6)</i>                           | 0 (0)       | 0 (0)       | 0 (0)       | 0 (0)       | 1 (2.4)     | 0 (0)       | 0 (0)       | NA                                                  |
| Mixed Race                              | <b>4 (100)</b>                       | <i>4 (5.1)</i>                           | 0 (0)       | 0 (0)       | 2 (25.0)    | 2 (28.6)    | 0 (0)       | 0 (0)       | 0 (0)       | -0.800 (0.086)                                      |
| AI/AN                                   | <b>0 (0)</b>                         | <i>0 (0)</i>                             | 0 (0)       | 0 (0)       | 0 (0)       | 0 (0)       | 0 (0)       | 0 (0)       | 0 (0)       | NA                                                  |
| <b>Total</b>                            | <b>79 (100)</b>                      | <i>79</i>                                | 0           | 0           | 8           | 7           | 41          | 21          | 2           |                                                     |

| <i>State/Province</i> |                   |            |           |           |           |           |           |           |           |                 |
|-----------------------|-------------------|------------|-----------|-----------|-----------|-----------|-----------|-----------|-----------|-----------------|
| Alberta               | <b>100 (100)</b>  | 100 (16.6) | 0 (0)     | 50 (62.5) | 50 (32.3) | 0 (0)     | 0 (0)     | 0 (0)     | 0 (0)     |                 |
| Alabama               | <b>4 (100)</b>    | 4 (0.7)    | 0 (0)     | 0 (0)     | 0 (0)     | 0 (0)     | 3 (2.5)   | 0 (0)     | 0 (0)     |                 |
| BC                    | <b>345 (98.9)</b> | 349 (57.8) | 13 (50.0) | 28 (35.0) | 75 (48.4) | 54 (80.6) | 58 (2.9)  | 51 (62.2) | 70 (95.9) |                 |
| California            | <b>23 (95.8)</b>  | 24 (4.0)   | 12 (46.2) | 2 (2.5)   | 5 (3.2)   | 0 (0)     | 3 (2.5)   | 2 (2.4)   | 0 (0)     |                 |
| Colorado              | <b>1 (100)</b>    | 1 (0.2)    | 0 (0)     | 0 (0)     | 0 (0)     | 0 (0)     | 0 (0)     | 1 (1.2)   | 0 (0)     |                 |
| CT                    | <b>1 (100)</b>    | 1 (0.2)    | 0 (0)     | 0 (0)     | 0 (0)     | 1 (1.5)   | 0 (0)     | 0 (0)     | 0 (0)     |                 |
| DC                    | <b>1 (100)</b>    | 1 (0.2)    | 0 (0)     | 0 (0)     | 0 (0)     | 0 (0)     | 0 (0)     | 1 (1.2)   | 0 (0)     | NA <sup>c</sup> |
| Georgia               | <b>25 (100)</b>   | 25 (4.1)   | 0 (0)     | 0 (0)     | 9 (5.8)   | 7 (10.4)  | 9 (7.5)   | 0 (0)     | 0 (0)     |                 |
| MA                    | <b>1 (100)</b>    | 1 (0.2)    | 1 (3.8)   | 0 (0)     | 0 (0)     | 0 (0)     | 0 (0)     | 0 (0)     | 0 (0)     |                 |
| Minnesota             | <b>2 (100)</b>    | 2 (0.3)    | 0 (0)     | 0 (0)     | 0 (0)     | 1 (1.5)   | 0 (0)     | 1 (1.2)   | 0 (0)     |                 |
| Missouri              | <b>4 (100)</b>    | 4 (0.7)    | 0 (0)     | 0 (0)     | 1 (0.6)   | 2 (3.0)   | 1 (1.3)   | 0 (0)     | 0 (0)     |                 |
| Nebraska              | <b>1 (100)</b>    | 1 (0.2)    | 0 (0)     | 0 (0)     | 0 (0)     | 0 (0)     | 1 (1.3)   | 0 (0)     | 0 (0)     |                 |
| New York              | <b>1 (100)</b>    | 1 (0.2)    | 0 (0)     | 0 (0)     | 1 (0.6)   | 0 (0)     | 0 (0)     | 0 (0)     | 0 (0)     |                 |
| Texas                 | <b>15 (100)</b>   | 15 (2.5)   | 0 (0)     | 0 (0)     | 14 (9.0)  | 0 (0)     | 0 (0)     | 0 (0)     | 1 (1.4)   |                 |
| Washington            | <b>74 (100)</b>   | 74 (12.3)  | 0 (0)     | 0 (0)     | 0 (0)     | 2 (3.0)   | 45 (37.5) | 25 (30.5) | 2 (2.7)   |                 |
| Wisconsin             | <b>1 (100)</b>    | 1 (0.2)    | 0 (0)     | 0 (0)     | 0 (0)     | 0 (0)     | 0 (0)     | 1 (1.2)   | 0 (0)     |                 |
| <i>Total</i>          | <b>599 (99.2)</b> | 604        | 26        | 80        | 155       | 67        | 120       | 82        | 73        |                 |

NHPI: Native Hawaiian/Pacific Islander. AI/AN: American Indian/Alaska Native. BC: British Columbia. CT: Connecticut DC: District of Columbia. MA: Massachusetts

<sup>a</sup>one additional AZ resistant sample was excluded from the longitudinal analysis due to uncertainty on year of collection (2020 or 2021).

<sup>b</sup>Congenital cases included all cases in infants less than 2 months old (n=5), and a case of syphilis in a 30-34 year old female, with detection of *T. pallidum* DNA in both fetal and maternal tissues

<sup>c</sup>State of collection is study-dependent. Studies were conducted during different time periods.

**Table S2: Representativeness of syphilis patients included in analysis.** The most recent comprehensive national demographic data from the United States Centers for Disease Control and Prevention, covering the period between 2013-2022<sup>56</sup>, and from the Canadian Public Health Agency, covering the period 2011-2020<sup>57</sup>, was used to determine representativeness.

| <b>Category</b>                                           | <b>Example</b>                                                                                                                                                                                                                                                                                                                                                                                                                                                                                                                                                                                                                                                                                                                                                                                                                |
|-----------------------------------------------------------|-------------------------------------------------------------------------------------------------------------------------------------------------------------------------------------------------------------------------------------------------------------------------------------------------------------------------------------------------------------------------------------------------------------------------------------------------------------------------------------------------------------------------------------------------------------------------------------------------------------------------------------------------------------------------------------------------------------------------------------------------------------------------------------------------------------------------------|
| <b>Disease, problem, or condition under investigation</b> | Azithromycin resistance in syphilis (all stages)                                                                                                                                                                                                                                                                                                                                                                                                                                                                                                                                                                                                                                                                                                                                                                              |
| <b>Special Considerations related to:</b>                 |                                                                                                                                                                                                                                                                                                                                                                                                                                                                                                                                                                                                                                                                                                                                                                                                                               |
| <i>Age</i>                                                | <p>Syphilis is most prevalent among 25-34 year olds for US males and females<sup>56</sup> vs males aged 25-39 and females aged 20-29 in Canada<sup>57</sup>.</p> <p>Cases of congenital syphilis are increased by a factor of ten over the prior decade<sup>56,57</sup>.</p>                                                                                                                                                                                                                                                                                                                                                                                                                                                                                                                                                  |
| <i>Sex/gender</i>                                         | <p>Rates of primary and secondary syphilis are highest among individuals designated male at birth in both the US and Canada (~30 per 100,000)<sup>56,57</sup>.</p> <p>Syphilis rates among females have increased rapidly in the last decade to approximately 9 per 100,000 population (United States) and 15 per 100,000 (Canada)<sup>56,57</sup>.</p> <p>The rate of syphilis among MSM (up to 1159 per 100,000) is higher than MSW (~27 per 100,000). MSM still account for the highest number of syphilis cases, but the number of cases in MSW and men with unidentified sex of sex partners has increased more rapidly since 2018<sup>56</sup>.</p> <p>Evidence from a geographically limited study suggests the lifetime prevalence of syphilis among transgender females is twice that of gay males<sup>58</sup>.</p> |
| <i>Race/ethnic group</i>                                  | In the US, the highest rates of syphilis were among American Indian/Alaska Native (AI/AN) persons (67 per 100,000 population in 2022) and Black persons (44.4 per 100,000). Asian and White persons had the lowest rates of syphilis (~5 and 10 per 100,000, respectively) <sup>56</sup> .                                                                                                                                                                                                                                                                                                                                                                                                                                                                                                                                    |
| <i>Geography</i>                                          | Syphilis has increased across all jurisdictions. In Canada, rates have increased most in the prairie provinces, while Nunavut has the highest overall rate of syphilis (127 per 100,000 population, in 2020) <sup>57</sup> . In the US, rates of syphilis are higher in the West and South US Census region than in the Midwest or Northeast <sup>56</sup> .                                                                                                                                                                                                                                                                                                                                                                                                                                                                  |
| <b>Other considerations</b>                               | <p>Rates of syphilis among all demographic groups is increasing in the US and Canada<sup>56,57</sup>.</p> <p>Due in part to the low treponemal burden in most stages of syphilis, direct detection of <i>T. pallidum</i> DNA has a low clinical sensitivity and is not routinely offered in North American clinical laboratories. Instead, collection of lesion or other swabs for subsequent DNA extraction and molecular testing, including for the presence of azithromycin resistance alleles, is largely confined to a handful of academic medical centers and reference laboratories, including state/provincial and national public health authorities. Reference laboratories frequently do not have access to patient demographic information.</p>                                                                   |



|                                                        |                                                                                                                                                                                                                                                                                                                                                                                                                                                                                                                                                                                                                                                                                                                                                                                                                                                                                                                                                                                                                                                                                                                                                                                                                                                                                                                                                                                                                                                                                                                                                                                                                                                                          |
|--------------------------------------------------------|--------------------------------------------------------------------------------------------------------------------------------------------------------------------------------------------------------------------------------------------------------------------------------------------------------------------------------------------------------------------------------------------------------------------------------------------------------------------------------------------------------------------------------------------------------------------------------------------------------------------------------------------------------------------------------------------------------------------------------------------------------------------------------------------------------------------------------------------------------------------------------------------------------------------------------------------------------------------------------------------------------------------------------------------------------------------------------------------------------------------------------------------------------------------------------------------------------------------------------------------------------------------------------------------------------------------------------------------------------------------------------------------------------------------------------------------------------------------------------------------------------------------------------------------------------------------------------------------------------------------------------------------------------------------------|
| <p><b>Overall representativeness of this study</b></p> | <p>Age and sex distribution of patients in this study are similar to that seen in North America: In our study between 2017-2023, females accounted for 20.8% of samples, while in the US in 2022, 24.8% of samples were from females. Among patients in our study, the most common age was 18-24 for females and 25-29 for males<sup>56,57</sup>.</p> <p>We detected a positive temporal trend in the incidence of congenital syphilis, consistent with its increase in incidence across North America.</p> <p>Our study included a larger proportion of MSM (83.0%) among males with partner information compared to syphilis cases across the United States (59.9%)<sup>56</sup>. This may be attributed to sample collection from clinics serving large proportions of MSM.</p> <p>The use of reference laboratory samples with sparse demographic data limits the conclusions we can draw about race/ethnicity: 79/604 (13.1%) of samples in this study included race/ethnicity information and were limited to only certain studies. Among the 79 samples with demographic information, 22 (27.8%) were from Black individuals, 33 (41.8%) from White individuals, and no samples were collected from American Indian/Alaska Native persons. Despite this, the limited data on race/ethnicity roughly reflects US data: In the United States, AI/AN, Black, and White individuals accounted for 2.8, 31.7, and 33.9% of primary and secondary syphilis cases in 2022, respectively<sup>56</sup>.</p> <p>Although our study includes samples from all four US census regions and two Canadian provinces, we do not have any data from most states and provinces.</p> |
|--------------------------------------------------------|--------------------------------------------------------------------------------------------------------------------------------------------------------------------------------------------------------------------------------------------------------------------------------------------------------------------------------------------------------------------------------------------------------------------------------------------------------------------------------------------------------------------------------------------------------------------------------------------------------------------------------------------------------------------------------------------------------------------------------------------------------------------------------------------------------------------------------------------------------------------------------------------------------------------------------------------------------------------------------------------------------------------------------------------------------------------------------------------------------------------------------------------------------------------------------------------------------------------------------------------------------------------------------------------------------------------------------------------------------------------------------------------------------------------------------------------------------------------------------------------------------------------------------------------------------------------------------------------------------------------------------------------------------------------------|

**Table S3: Annotated bibliography of studies worldwide evaluating genotypic AZ resistance in *T. pallidum*.**

| Years     | Location                         | Macrolide Resistance | Findings                                                                                                                                                                                                            | Reference     |
|-----------|----------------------------------|----------------------|---------------------------------------------------------------------------------------------------------------------------------------------------------------------------------------------------------------------|---------------|
| 2004-2017 | Czech Republic (Prague and Brno) | <b>90%</b>           | 2016/2017 87% A2058G mutants, 3% A2059G mutants (n=54). Samples collected at two hospitals each in Prague and Brno.                                                                                                 | <sup>59</sup> |
| 2005-2020 | Australia (multiple locations)   | <b>87%</b>           | 87% (398/456) strains were macrolide resistant (allele information not specified). Samples were obtained from the provincial reference laboratory                                                                   | <sup>60</sup> |
| 2006-2018 | The Netherlands (Amsterdam)      | <b>81%</b>           | 79% A2058G, 2% A2059G (n=123). Samples collected from an STI clinic in Amsterdam.                                                                                                                                   | <sup>61</sup> |
| 2008-2018 | South Africa, Botswana, Zimbabwe | <b>23%</b>           | 23% (22/96) samples AZ resistant via A2058G, with detection only showing up 2013 and onwards. Samples collected from primary health care facilities participating in national STI etiological surveillance programs | <sup>62</sup> |
| 2010-2022 | France                           | <b>75.6 %</b>        | 75.6% (226/299) samples AZ resistant via A2058G. Samples received at national reference center.                                                                                                                     | <sup>63</sup> |
| 2013-2017 | Japan (Osaka)                    | <b>86.1%</b>         | 86.1% macrolide resistant via A2058G. Resistance in heterosexual groups was 96.6%, while MSM showed 42.9% resistance. Samples collected from STI clinics in Osaka, Japan.                                           | <sup>64</sup> |
| 2014-2018 | Japan (Tokyo and Osaka)          | <b>80%</b>           | 80% (16/20) strains were macrolide resistant, all via A2058G. Samples collected from four clinics and a hospital.                                                                                                   | <sup>65</sup> |

|           |                             |              |                                                                                                                                                                                                                            |               |
|-----------|-----------------------------|--------------|----------------------------------------------------------------------------------------------------------------------------------------------------------------------------------------------------------------------------|---------------|
| 2015-2019 | Argentina (Buenos Aires)    | <b>45.7%</b> | 45.7% (16/35) macrolide resistant. 93.7% (15/16) A2058G resistant, 1 A2059G mutation found. Samples collected from patients at an STI clinic in Buenos Aires.                                                              | <sup>66</sup> |
| 2015-2019 | Brazil                      | <b>23.5%</b> | 23.5% (16/68) positive for macrolide resistance. 7.4% (5/68) A2058G resistant, 8.8% (6/68) A2059G resistant, 7.4% (5/68) with dual mutation resistance. Samples were from female sex workers                               | <sup>67</sup> |
| 2016-2017 | The Netherlands (Amsterdam) | <b>88%</b>   | 88% (83/93) samples AZ resistant via A2058G. Samples were collected from STI clinics in Amsterdam and general practitioners                                                                                                | <sup>68</sup> |
| 2016-2017 | China (Xinjiang)            | <b>100%</b>  | 100% (27/27) positive for macrolide resistance, 88.9% (24/27) A2058G resistant, 11.1% (3/27) A2059G resistant. Samples collected from whole blood in latent syphilis patients at the First Hospital of Xinjiang University | <sup>69</sup> |
| 2017      | Italy (multiple locations)  | <b>90%</b>   | 90% (9/10) strains were macrolide resistant via A2058G. Samples were collected from STI and dermatology clinics                                                                                                            | <sup>10</sup> |
| 2017-2018 | Japan (Tokyo and Osaka)     | <b>86%</b>   | 86% (96/112) A2058G allele, no A2059G. Samples collected from four clinics and a hospital. Samples from MSM were approximately 60% likely to have a resistance allele, while in women and MSM AZ resistance exceeds 95%.   | <sup>70</sup> |
| 2017-2018 | China (Guangzhou)           | <b>100%</b>  | 100% (6/6) strains were macrolide resistant, all via A2058G. Samples were collected from the                                                                                                                               | <sup>71</sup> |

|           |                                       |              |                                                                                                                                                       |                  |
|-----------|---------------------------------------|--------------|-------------------------------------------------------------------------------------------------------------------------------------------------------|------------------|
|           |                                       |              | Dermatology Hospital of Southern Medical University                                                                                                   |                  |
| 2017-2018 | United Kingdom (multiple locations)   | <b>94.7%</b> | 94.7% (72/76) strains were macrolide resistant. Of resistant strains, 97.2% (70/72) were resistant via A2058G, 2.8% (2/72) were resistant via A2059G. | <sup>72,73</sup> |
| 2017-2019 | Canada (Alberta and British Columbia) | <b>92.1%</b> | 92.1% (35/38) strains were unambiguously macrolide resistant. 94.3% (33/35) were resistant via A2058G, 5.7% (2/35) were resistant via A2059G.         | <sup>73</sup>    |
| 2017-2020 | Canada (Manitoba)                     | <b>99.8%</b> | 99.8% (809/811) macrolide resistant based on A2058G mutation. No A2059G found.                                                                        | <sup>74</sup>    |
| 2018      | China (Nanjing)                       | <b>100%</b>  | 100% (8/8) strains were macrolide resistant via A2058G. Samples were collected from a dermatology clinic.                                             | <sup>10</sup>    |
| 2018      | Reunion Island                        | <b>100%</b>  | 100% (7/7) samples AZ resistant via A2058G. Samples collected by the Reunion Island University Hospital                                               | <sup>75</sup>    |
| 2018-2019 | Cuba (Havana)                         | <b>81%</b>   | 81% isolates (n=32) were macrolide resistant via A2058G. Samples collected from the Tropical Medicine Institute Pedro Kouri in Havana.                | <sup>76</sup>    |
| 2018-2019 | Hungary (multiple locations)          | <b>50%</b>   | 50% (5/10) strains were unambiguously macrolide resistant, all via A2058G.                                                                            | <sup>73</sup>    |
| 2019      | Peru (multiple locations)             | <b>77.8%</b> | 77.8% (7/9) strains were macrolide resistant via A2058G. Samples were collected from STI clinics.                                                     | <sup>10</sup>    |
| 2019      | Sweden (multiple locations)           | <b>100%</b>  | 100% (7/7) strains were macrolide resistant via A2058G.                                                                                               | <sup>73</sup>    |
| 2019-2020 | Japan (Tokyo)                         | <b>100%</b>  | 100% (53/53) strains were macrolide resistant via A2058G. Samples were                                                                                | <sup>10</sup>    |

|           |                   |             |                                                                                                                                                                                                           |               |
|-----------|-------------------|-------------|-----------------------------------------------------------------------------------------------------------------------------------------------------------------------------------------------------------|---------------|
|           |                   |             | collected from a dermatology clinic.                                                                                                                                                                      |               |
| 2019-2022 | China (Guangzhou) | <b>100%</b> | 100% (52/52) strains were macrolide resistant, 92.3% (48/52) via A2058G and 7.7% (4/52) via A2059G. Samples were collected from an STI clinic at the Dermatology Hospital of Southern Medical University. | <sup>77</sup> |
| 2019-2022 | Malawi (Lilongwe) | <b>15%</b>  | 15% (12/80) strains were macrolide resistant, all via A2058G. Samples were collected from a STI clinic                                                                                                    | <sup>78</sup> |
| 2019-2022 | Colombia (Cali)   | <b>50%</b>  | 50% (13/26) strains were macrolide resistant, all via A2058G. Samples were collected from a public sector healthcare network.                                                                             | <sup>78</sup> |
|           |                   |             |                                                                                                                                                                                                           |               |

Pubmed searches were performed between October 20<sup>th</sup> and November 8<sup>th</sup>, 2023. Search terms included “syphilis azithromycin”, “syphilis A2058G”, “syphilis macrolide”, “*T. pallidum* azithromycin”, “syphilis whole genome sequencing”. When per sample data were available, dates were filtered to include only samples obtained in 2017 or later. When per sample data were not available, results are limited to those studies that included at least one sample collected since Jan 1, 2017. Datasets with fewer than five samples have been excluded. Studies with any samples included in the current work have been excluded.

## Supplementary References

1. Golden M, O'Donnell M, Lukehart S, et al. *Treponema pallidum* Nucleic Acid Amplification Testing To Augment Syphilis Screening among Men Who Have Sex with Men. *J Clin Microbiol* 2019;57(8):e00572-19.
2. Lieberman NAP, Lin MJ, Xie H, et al. *Treponema pallidum* genome sequencing from six continents reveals variability in vaccine candidate genes and dominance of Nichols clade strains in Madagascar. *PLoS Negl Trop Dis* 2021;15(12):e0010063.
3. McCormick DW, Rassouljian-Barrett SL, Hoogestraat DR, et al. *Bartonella* spp. Infections Identified by Molecular Methods, United States. *Emerg Infect Dis* 2023;29(3):467–76.
4. Lee SA, Plett SK, Luetkemeyer AF, et al. *Bartonella quintana* Aortitis in a Man with AIDS, Diagnosed by Needle Biopsy and 16S rRNA Gene Amplification. *J Clin Microbiol* 2015;53(8):2773–6.
5. Lieberman JA, Bryan A, Mays JA, et al. High Clinical Impact of Broad-Range Fungal PCR in Suspected Fungal Sinusitis. *J Clin Microbiol* 2021;59(11):e0095521.
6. Morshed M, Lee M-K, Laley J, et al. British Columbia's Experience after Implementation of the *Treponema pallidum* Reverse Algorithm and PCR Detection, 2015 to 2020. *Microbiol Spectr* 2022;10(3):e00686-22.
7. Chen C-Y, Chi K-H, George RW, et al. Diagnosis of gastric syphilis by direct immunofluorescence staining and real-time PCR testing. *J Clin Microbiol* 2006;44(9):3452–6.
8. Lieberman NAP, Avendaño CC, Bakhash SAKM, et al. Genomic Epidemiology of *Treponema pallidum* and Circulation of Strains With Diminished *tprK* Antigen Variation Capability in Seattle, 2021–2022. *The Journal of Infectious Diseases* 2023;jiad368.
9. Aldrete S, Kroft SH, Romeis E, et al. Whole Genome Sequence of a *Treponema pallidum* Strain From a Formalin-Fixed, Paraffin-Embedded Fine Needle Aspirate of a Cervical Lymph Node. *Sex Transm Dis* 2023;50(8):550–2.
10. Lieberman NAP, Lin MJ, Xie H, et al. *Treponema pallidum* genome sequencing from six continents reveals variability in vaccine candidate genes and dominance of Nichols clade strains in Madagascar. *PLoS Negl Trop Dis* 2021;15(12):e0010063.
11. Bolger AM, Lohse M, Usadel B. Trimmomatic: a flexible trimmer for Illumina sequence data. *Bioinformatics* 2014;30(15):2114–20.
12. Bushnell B. BBDMap short read aligner, and other bioinformatic tools.
13. Langmead B, Salzberg SL. Fast gapped-read alignment with Bowtie 2. *Nat Methods* 2012;9(4):357–9.

14. Garrison E, Marth G. Haplotype-based variant detection from short-read sequencing. 2012 [cited 2023 Nov 8]; Available from: <https://arxiv.org/abs/1207.3907>
15. Wick RR, Judd LM, Gorrie CL, Holt KE. Unicycler: Resolving bacterial genome assemblies from short and long sequencing reads. *PLoS Comput Biol* 2017;13(6):e1005595.
16. Walker BJ, Abeel T, Shea T, et al. Pilon: An Integrated Tool for Comprehensive Microbial Variant Detection and Genome Assembly Improvement. *PLoS ONE* 2014;9(11):e112963.
17. Katoh K, Standley DM. MAFFT Multiple Sequence Alignment Software Version 7: Improvements in Performance and Usability. *Molecular Biology and Evolution* 2013;30(4):772–80.
18. Page AJ, Taylor B, Delaney AJ, et al. SNP-sites: rapid efficient extraction of SNPs from multi-FASTA alignments. *Microb Genom* 2016;2(4):e000056.
19. Nguyen L-T, Schmidt HA, von Haeseler A, Minh BQ. IQ-TREE: A Fast and Effective Stochastic Algorithm for Estimating Maximum-Likelihood Phylogenies. *Molecular Biology and Evolution* 2015;32(1):268–74.
20. Yu G, Smith DK, Zhu H, Guan Y, Lam TT. ggtree: an R package for visualization and annotation of phylogenetic trees with their covariates and other associated data. *Methods Ecol Evol* 2017;8(1):28–36.
21. Lukehart SA, Godornes C, Molini BJ, et al. Macrolide resistance in *Treponema pallidum* in the United States and Ireland. *N Engl J Med* 2004;351(2):154–8.
22. Chen C-Y, Chi K-H, Pillay A, Nachamkin E, Su JR, Ballard RC. Detection of the A2058G and A2059G 23S rRNA Gene Point Mutations Associated with Azithromycin Resistance in *Treponema pallidum* by Use of a TaqMan Real-Time Multiplex PCR Assay. *J Clin Microbiol* 2013;51(3):908–13.
23. Thurlow CM, Joseph SJ, Ganova-Raeva L, et al. Selective Whole-Genome Amplification as a Tool to Enrich Specimens with Low *Treponema pallidum* Genomic DNA Copies for Whole-Genome Sequencing. *mSphere* 2022;e0000922.
24. Pereira LE, Katz SS, Sun Y, et al. Successful isolation of *Treponema pallidum* strains from patients' cryopreserved ulcer exudate using the rabbit model. *PLoS One* 2020;15(1):e0227769.
25. Dionne JA, Giacani L, Tamhane A, et al. Prevalence and Predictors of Oral *Treponema pallidum* Detection by qPCR in Early Syphilis. *The Journal of Infectious Diseases* 2024; Accepted.
26. Nurse-Findlay S, Taylor MM, Savage M, et al. Shortages of benzathine penicillin for prevention of mother-to-child transmission of syphilis: An evaluation from multi-country surveys and stakeholder interviews. *PLoS Med* 2017;14(12):e1002473.

27. FDA Drug Shortages [Internet]. [cited 2023 Nov 6]; Available from: [https://www.accessdata.fda.gov/scripts/drugshortages/dsp\\_ActiveIngredientDetails.cfm?AI=Penicillin%20G%20Benzathine%20Injectable%20Suspension&st=c](https://www.accessdata.fda.gov/scripts/drugshortages/dsp_ActiveIngredientDetails.cfm?AI=Penicillin%20G%20Benzathine%20Injectable%20Suspension&st=c)
28. Clinical Reminders during Bicillin L-A® Shortage [Internet]. 2023 [cited 2023 Nov 6]; Available from: <https://www.cdc.gov/std/dstdp/dcl/2023-july-20-Mena-BicillinLA.htm>
29. Kingston M, French P, Higgins S, et al. UK national guidelines on the management of syphilis 2015. *Int J STD AIDS* 2016;27(6):421–46.
30. Matsumoto T. [Guidelines on the diagnosis and treatment of sexually transmitted diseases]. *Nihon Rinsho* 2009;67(1):23–9.
31. Workowski KA, Bachmann LH, Chan PA, et al. Sexually Transmitted Infections Treatment Guidelines, 2021. *MMWR Recomm Rep* 2021;70(4):1–187.
32. Drug Shortages List [Internet]. [cited 2023 Dec 4]; Available from: <https://www.ashp.org/Drug-Shortages/Current-Shortages/drug-shortages-list>
33. Cao Y, Su X, Wang Q, et al. A Multicenter Study Evaluating Ceftriaxone and Benzathine Penicillin G as Treatment Agents for Early Syphilis in Jiangsu, China. *Clin Infect Dis* 2017;65(10):1683–8.
34. Marra CM, Slatter V, Tartaglione TA, Baker-Zander SA, Lukehart SA. Evaluation of Aqueous Penicillin G and Ceftriaxone for Experimental Neurosyphilis. *Journal of Infectious Diseases* 1992;165(2):396–7.
35. Tantalo LC, Lieberman NAP, Pérez-Mañá C, et al. Antimicrobial susceptibility of *Treponema pallidum* subspecies *pallidum*: an in-vitro study. *Lancet Microbe* 2023;S2666-5247(23)00219-7.
36. Stafylis C, Keith K, Mehta S, et al. Clinical Efficacy of Cefixime for the Treatment of Early Syphilis. *Clin Infect Dis* 2021;73(5):907–10.
37. Haynes AM, Giacani L, Mayans MV, et al. Efficacy of linezolid on *Treponema pallidum*, the syphilis agent: A preclinical study. *EBioMedicine* 2021;65:103281.
38. Cottagnoud P. Linezolid against penicillin-sensitive and -resistant pneumococci in the rabbit meningitis model. *Journal of Antimicrobial Chemotherapy* 2000;46(6):981–5.
39. Ubals M, Nadal-Baron P, Arando M, et al. Oral linezolid compared with benzathine penicillin G for treatment of early syphilis in adults (Trep-AB Study) in Spain: a prospective, open-label, non-inferiority, randomised controlled trial. *Lancet Infect Dis* 2024;S1473-3099(23)00683-7.
40. Mitja O. Oral and Neuro-Penetrative Alternative Antibiotics for Patients With Syphilis [Internet]. [clinicaltrials.gov](https://clinicaltrials.gov/study/NCT05069974); 2023 [cited 2022 Dec 31]. Available from: <https://clinicaltrials.gov/study/NCT05069974>



41. Hayes KA, Dressler JM, Norris SJ, Edmondson DG, Jutras BL. A large screen identifies beta-lactam antibiotics which can be repurposed to target the syphilis agent. *npj Antimicrob Resist* 2023;1(1):4.
42. Grimes M, Sahi SK, Godornes BC, et al. Two mutations associated with macrolide resistance in *Treponema pallidum*: increasing prevalence and correlation with molecular strain type in Seattle, Washington. *Sex Transm Dis* 2012;39(12):954–8.
43. Molini BJ, Tantalo LC, Sahi SK, et al. Macrolide Resistance in *Treponema pallidum* Correlates With 23S rDNA Mutations in Recently Isolated Clinical Strains. *Sexual Trans Dis* 2016;43(9):579–83.
44. Centers for Disease Control (CDC). Sexually transmitted diseases treatment guidelines 1982. *MMWR Morb Mortal Wkly Rep* 1982;31 Suppl 2:33S-60S.
45. Stamm LV, Stapleton JT, Bassford PJ. In vitro assay to demonstrate high-level erythromycin resistance of a clinical isolate of *Treponema pallidum*. *Antimicrob Agents Chemother* 1988;32(2):164–9.
46. Sexually transmitted diseases treatment guidelines 2002. Centers for Disease Control and Prevention. *MMWR Recomm Rep* 2002;51(RR-6):1–78.
47. Hook EW, Martin DH, Stephens J, Smith BS, Smith K. A randomized, comparative pilot study of azithromycin versus benzathine penicillin G for treatment of early syphilis. *Sex Transm Dis* 2002;29(8):486–90.
48. Van Damme K, Behets F, Ravelomanana N, et al. Evaluation of Azithromycin Resistance in *Treponema pallidum* Specimens From Madagascar. *Sexually Transmitted Diseases* 2009;36(12):775–6.
49. Mitchell SJ, Engelman J, Kent CK, Lukehart SA, Godornes C, Klausner JD. Azithromycin-resistant syphilis infection: San Francisco, California, 2000-2004. *Clin Infect Dis* 2006;42(3):337–45.
50. Hooda Y, Tanmoy AM, Sajib MSI, Saha S. Mass azithromycin administration: considerations in an increasingly resistant world. *BMJ Glob Health* 2020;5(6):e002446.
51. Marra CM, Colina AP, Godornes C, et al. Antibiotic selection may contribute to increases in macrolide-resistant *Treponema pallidum*. *J Infect Dis* 2006;194(12):1771–3.
52. A2058G Prevalence Workgroup. Prevalence of the 23S rRNA A2058G point mutation and molecular subtypes in *Treponema pallidum* in the United States, 2007 to 2009. *Sex Transm Dis* 2012;39(10):794–8.
53. Beale MA, Marks M, Sahi SK, et al. Genomic epidemiology of syphilis reveals independent emergence of macrolide resistance across multiple circulating lineages. *Nat Commun* 2019;10(1):3255.

54. Ballow CH, Amsden GW. Azithromycin: the first azalide antibiotic. *Ann Pharmacother* 1992;26(10):1253–61.
55. Hancox JC, Hasnain M, Vieweg WVR, Crouse ELB, Baranchuk A. Azithromycin, cardiovascular risks, QTc interval prolongation, torsade de pointes, and regulatory issues: A narrative review based on the study of case reports. *Ther Adv Infect Dis* 2013;1(5):155–65.
56. Sexually Transmitted Infections Surveillance, 2022 [Internet]. 2024 [cited 2024 Feb 15]; Available from: <https://www.cdc.gov/std/statistics/2022/default.htm>
57. Aho J, Lybeck C, Tetteh A, et al. Rising syphilis rates in Canada, 2011-2020. *Can Commun Dis Rep* 2022;48(23):52–60.
58. Xavier Hall CD, Ryan D, Hayford C, et al. Syphilis Prevalence, Incidence, and Demographic Differences in a Longitudinal Study of Young Sexual and Gender Minority Adults Assigned Male at Birth. *The Journal of Infectious Diseases* 2024;229(1):232–6.
59. Vrbová E, Grillová L, Mikalová L, et al. MLST typing of *Treponema pallidum* subsp. *pallidum* in the Czech Republic during 2004-2017: Clinical isolates belonged to 25 allelic profiles and harbored 8 novel allelic variants. *PLoS ONE* 2019;14(5):e0217611.
60. Taouk ML, Taiaroa G, Pasricha S, et al. Characterisation of *Treponema pallidum* lineages within the contemporary syphilis outbreak in Australia: a genomic epidemiological analysis. *Lancet Microbe* 2022;3(6):e417–26.
61. Zondag HCA, Bruisten SM, Vrbová E, Šmajš D. No bejel among Surinamese, Antillean and Dutch syphilis diagnosed patients in Amsterdam between 2006–2018 evidenced by multi-locus sequence typing of *Treponema pallidum* isolates. *PLoS ONE* 2020;15(3):e0230288.
62. Venter JME, Müller EE, Mahlangu MP, Kularatne RS. *Treponema pallidum* Macrolide Resistance and Molecular Epidemiology in Southern Africa, 2008 to 2018. *J Clin Microbiol* 2021;59(10):e0238520.
63. Salle R, Grange PA, Ollagnier G, et al. *Treponema pallidum* resistance to azithromycin in France: A nationwide retrospective study from 2010 to 2022. *Acad Dermatol Venereol* 2023;jdv.19399.
64. Kojima Y, Furubayashi K, Kawahata T, Mori H, Komano J. Circulation of Distinct *Treponema pallidum* Strains in Individuals with Heterosexual Orientation and Men Who Have Sex with Men. *J Clin Microbiol* 2019;57(1):e01148-18.
65. Nishiki S, Lee K, Kanai M, Nakayama S-I, Ohnishi M. Phylogenetic and genetic characterization of *Treponema pallidum* strains from syphilis patients in Japan by whole-genome sequence analysis from global perspectives. *Sci Rep* 2021;11(1):3154.
66. Morando N, Vrbová E, Melgar A, Rabinovich RD, Šmajš D, Pando MA. High frequency of Nichols-like strains and increased levels of macrolide resistance in *Treponema pallidum* in clinical samples from Buenos Aires, Argentina. *Sci Rep* 2022;12(1):16339.

67. Coelho EC, Souza SB, Costa CCS, et al. *Treponema pallidum* in female sex workers from the Brazilian Marajó Archipelago: prevalence, risk factors, drug-resistant mutations and coinfections. *Trans R Soc Trop Med Hyg* 2021;115(7):792–800.
68. Zondag HCA, Zwezerijnen-Jiwa FH, de Vries HJC, De Baetselier I, Bruisten SM. *Treponema pallidum* Strains Among Women and Men Who Have Sex With Women in Amsterdam, the Netherlands and Antwerp, Belgium Between 2014 and 2020. *Sex Transm Dis* 2023;50(6):e5–7.
69. Wang X, Abliz P, Deng S. Molecular Characteristics of Macrolide Resistance in *Treponema pallidum* from Patients with Latent Syphilis in Xinjiang, China. *IDR* 2023;Volume 16:1231–6.
70. Nishiki S, Arima Y, Kanai M, Shimuta K, Nakayama S-I, Ohnishi M. Epidemiology, molecular strain types, and macrolide resistance of *Treponema pallidum* in Japan, 2017-2018. *J Infect Chemother* 2020;26(10):1042–7.
71. Chen W, Šmajš D, Hu Y, et al. Analysis of *Treponema pallidum* Strains From China Using Improved Methods for Whole-Genome Sequencing From Primary Syphilis Chancres. *J Infect Dis* 2021;223(5):848–53.
72. Beale MA, Thorn L, Cole MJ, et al. Genomic epidemiology of syphilis in England: a population-based study. *The Lancet Microbe* 2023;4(10):e770–80.
73. Beale MA, Marks M, Cole MJ, et al. Global phylogeny of *Treponema pallidum* lineages reveals recent expansion and spread of contemporary syphilis. *Nat Microbiol* 2021;6(12):1549–60.
74. Tsang RS, Shuel M, Hoang W, et al. Characteristics of polymerase chain reaction-positive syphilis cases in Manitoba, Canada, 2017 to 2020: Demographic analysis, specimen types, and *Treponema pallidum* gene targets. *J Assoc Med Microbiol Infect Dis Can* 2022;7(3):170–80.
75. Bourgeois G, Grange P, Saint-Pastou Terrier C, et al. Azithromycin resistance in *Treponema pallidum* in Reunion Island: A cross-sectional study. *Annales de Dermatologie et de Vénérologie* 2021;148(3):165–7.
76. Noda AA, Rodríguez I, Šmajš D. Genotyping of *Treponema pallidum* in Cuba (2018–2019): Increased Circulation of Recombinant Genotype and No New *Treponema pallidum* Subspecies endemicum Infection Among Syphilis Patients. *Sexual Trans Dis* 2020;47(10):e39–41.
77. Yang L, Zhang X, Chen W, et al. Early syphilis in Guangzhou, China: presentation, molecular detection of *Treponema pallidum*, and genomic sequences in clinical specimens and isolates obtained by rabbit infectivity testing [Internet]. *Infectious Diseases (except HIV/AIDS)*; 2023 [cited 2023 Nov 8]. Available from: <http://medrxiv.org/lookup/doi/10.1101/2023.10.17.23297169>

78. Seña AC, Matoga MM, Yang L, et al. Clinical and genomic diversity of *Treponema pallidum* *subsp. pallidum*: A global, multi-center study of early syphilis to inform vaccine research [Internet]. *Infectious Diseases (except HIV/AIDS)*; 2023 [cited 2023 Nov 8]. Available from: <http://medrxiv.org/lookup/doi/10.1101/2023.07.19.23291250>
